# Supplementary material for: Enhancing two-dimensional perovskite photodetector performance through balancing carrier density and directional transport
Source: Royal Society of Chemistry journal article supplement (doi:10.1039/d2ta04288f), 2022-01-01
Supplement: d2ta04288f1.pdf [file d2ta04288f1.pdf]

## Supporting information

### **Enhancing Two-dimensional Perovskite Photodetector Performance through Balancing Carrier Density and Directional Transport**

Tao Huang, Zhicheng Zhu, Chen Zhao, Wenchi Kong, Xuhang Chen, Ruiyan Li, Zhi Yu, Zhiming Sh<sup>d</sup>, Dabing Li, Bai Yang, Weili Yu

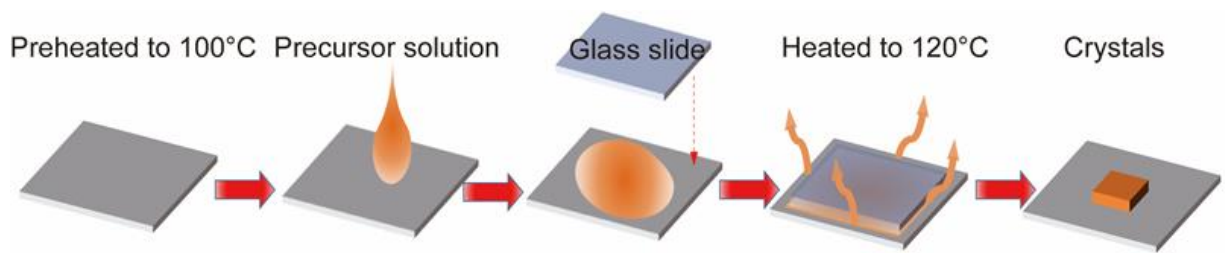

**Fig. S1** Schematic illustration of the in situ inverse temperature crystallization method to grow 2D layered  $\text{PEA}_2\text{MA}_{n-1}\text{Pb}_{n+1}$  single crystals.

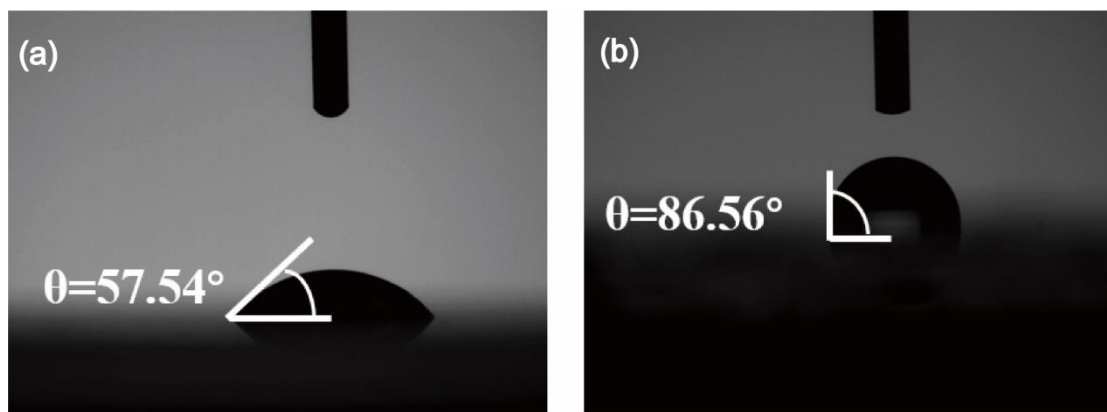

**Fig. S2.** Comparison of the hydrophobicity with glass substrates. (a) Substrate without hydrophobic treatment. (b) Substrate after hydrophobic treatment.

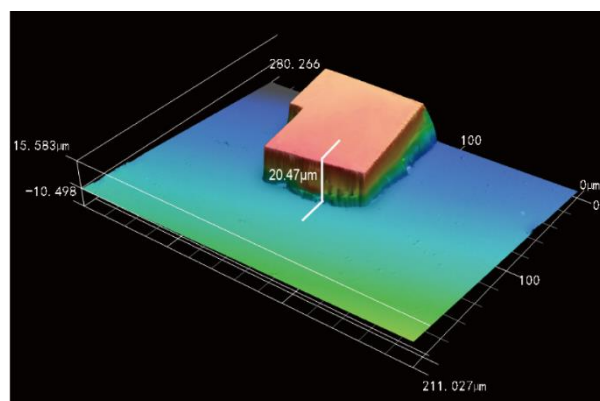

**Fig. S3.** 3D pseudo color plot of the  $\text{PEA}_2\text{MA}_3\text{Pb}_4\text{I}_{13}$  single crystals.

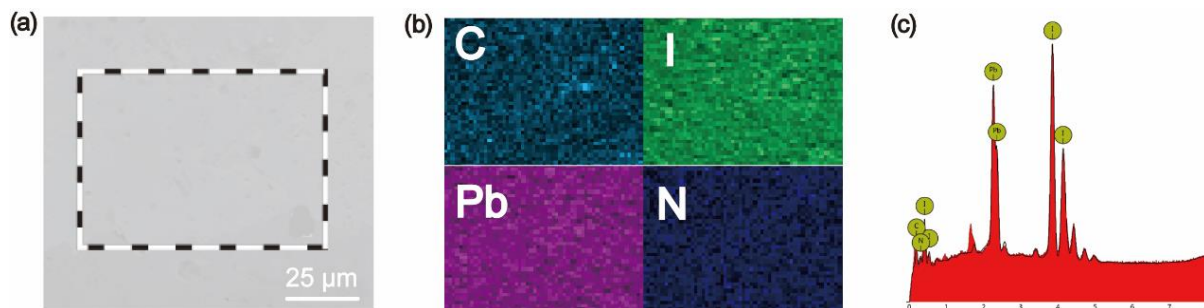

**Fig. S4** (a) SEM image of  $(\text{PEA})_2(\text{MA})_3\text{Pb}_4\text{I}_{13}$  single crystal surface. (b) EDS mapping of  $(\text{PEA})_2(\text{MA})_3\text{Pb}_4\text{I}_{13}$  single crystal, which shows uniform elemental distribution of carbon, lead, iodine and, nitrogen respective. (c) The EDS spectra of selected area.

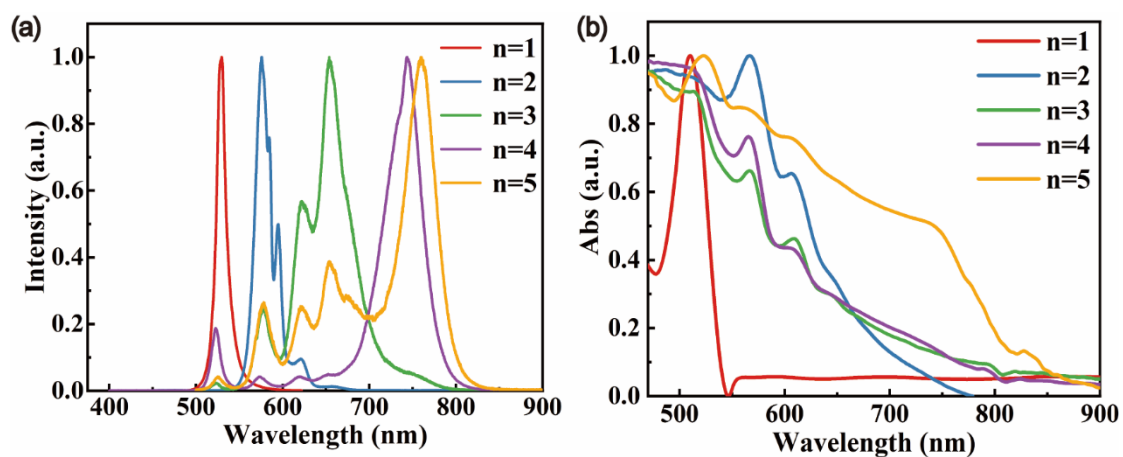

**Fig. S5** (a) Photoluminescence spectra and (b) absorption spectra of 2D perovskite polycrystalline films with different layers.

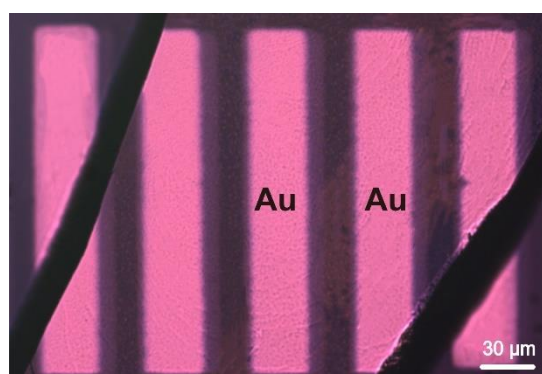

**Fig. S6** The optical image of Au electrodes evaporated on the surface of crystal.

**Table S1** TRPL fitting data of 2D perovskite with different layers.

| n values | p <sub>1</sub> (%) | t <sub>1</sub> (ns) | p <sub>2</sub> (%) | t <sub>2</sub> (ns) | t <sub>ave</sub> (ns) |
|----------|--------------------|---------------------|--------------------|---------------------|-----------------------|
| n=1      | 22.77              | 0.118               | 77.23              | 0.516               | 0.425                 |
| n=2      | 57.37              | 0.918               | 42.63              | 5.348               | 2.807                 |
| n=3      | 58.2               | 1.781               | 41.8               | 6.584               | 3.789                 |
| n=4      | 56.67              | 1.204               | 43.33              | 12.398              | 6.054                 |
| n=5      | 81.77              | 2.497               | 18.23              | 59.944              | 12.967                |

Note:  $t_{ave} = p_1 \times t_1 + p_2 \times t_2$ , among which  $t_{ave}$  is the average carrier lifetime;  $t_1, t_2$  are the carrier lifetimes; and  $f_1, f_2$  are the fractional contributions.

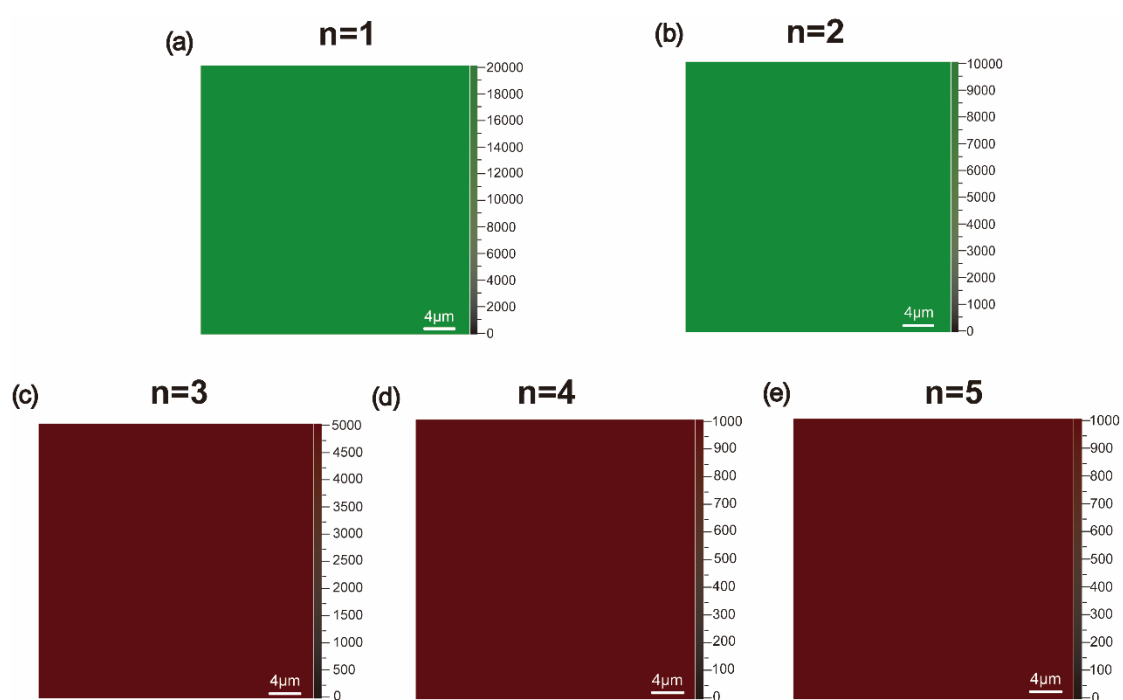

**Fig. S7** (a)-(e) PL mapping intensity of 2D single crystals (n=1-5) with the excitation of 473 nm laser.

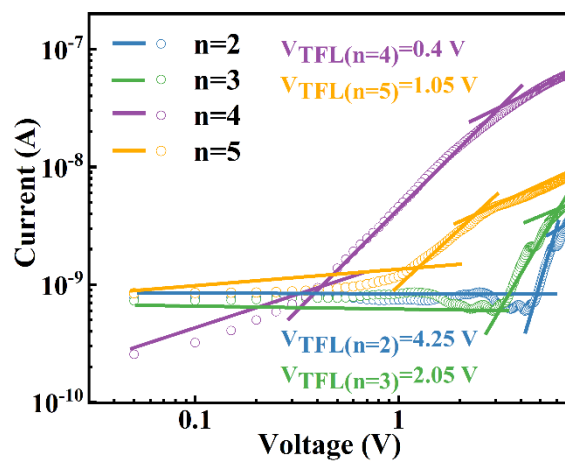

Fig. S8 SCLC curves of 2D single crystals.

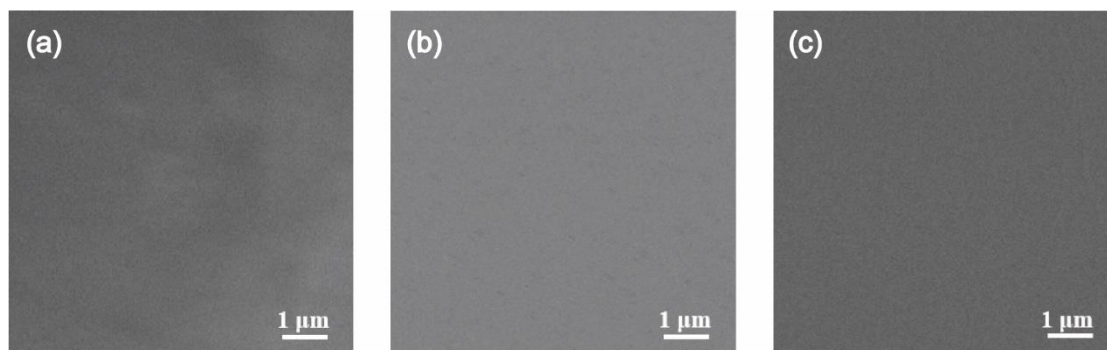

Fig. S9 SEM images of 2D perovskite single crystals with different layers. (a) n=2. (b) n=3. (c) n=5.

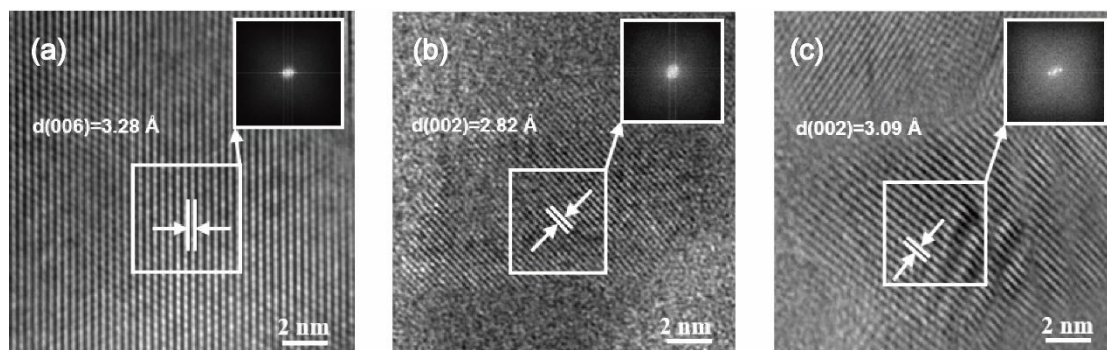

Fig. S10 HRTEM images of 2D perovskite single crystals with different layers. The embedded images are the FFT transform of the selected area. (a) n=2. (b) n=3. (c) n=5.

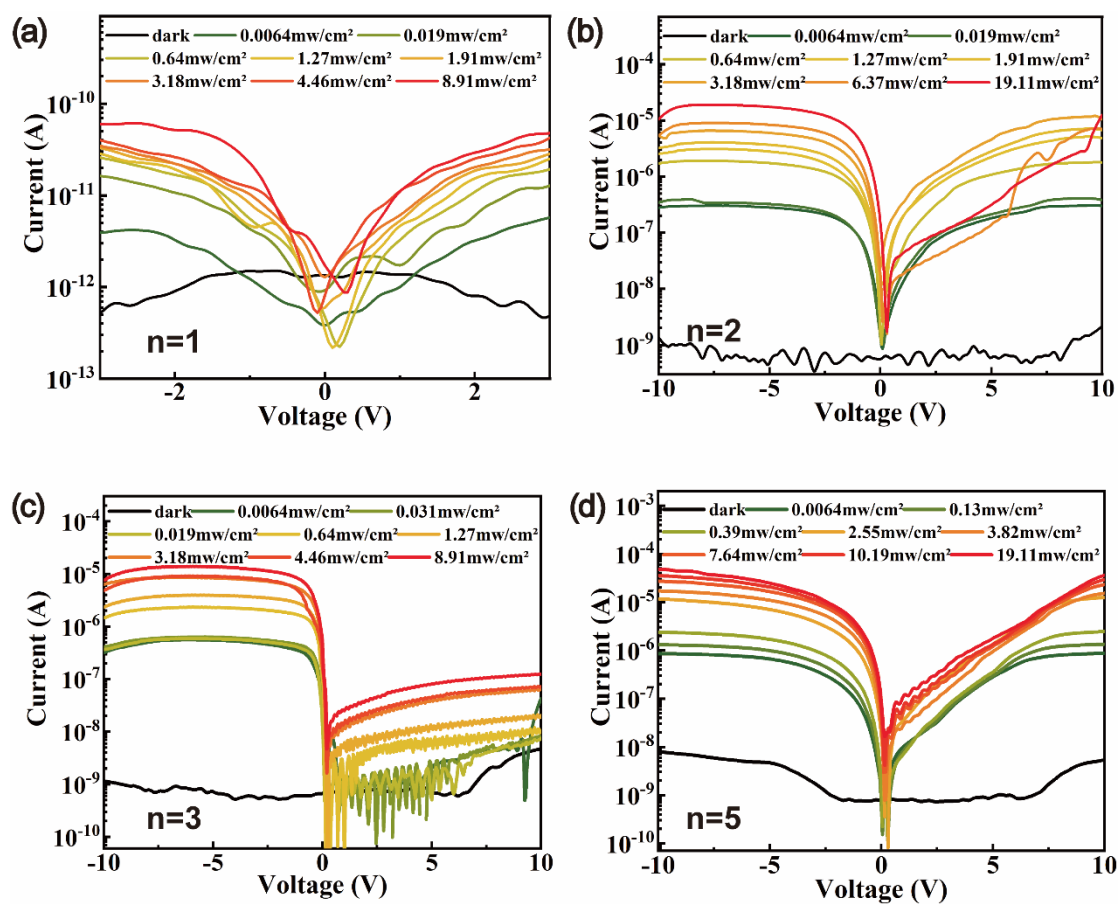

Fig. S11 The current–voltage (I–V) curves in dark and under 532 nm light illumination with varying light intensities for (a)  $n=1$ , (b)  $n=2$ , (c)  $n=3$  and (d)  $n=5$ .

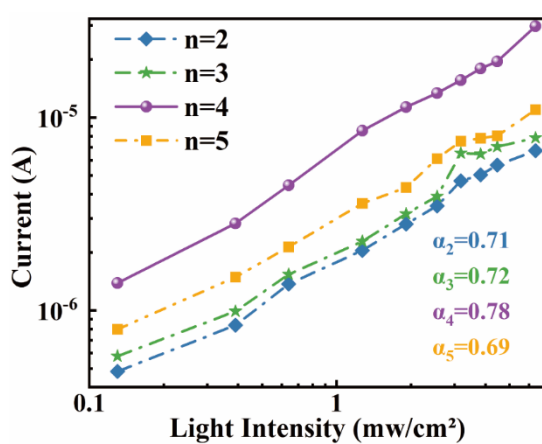

Fig. S12 Photocurrent values of the corresponding devices versus light intensity on a double-logarithmic scale for  $n=2,3,4$  and  $5$ . The bias is under  $3V$ .

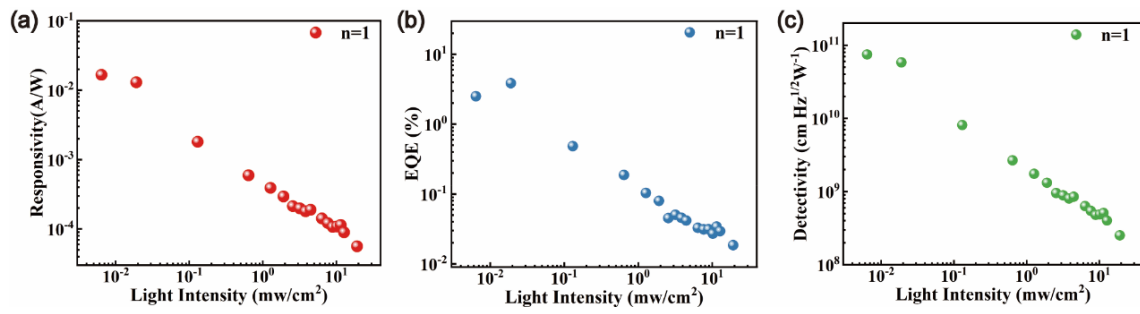

**Fig. S13** (a) Responsivity, (b) EQE and (c) detectivity as a function of incident light intensity for  $n=1$ .

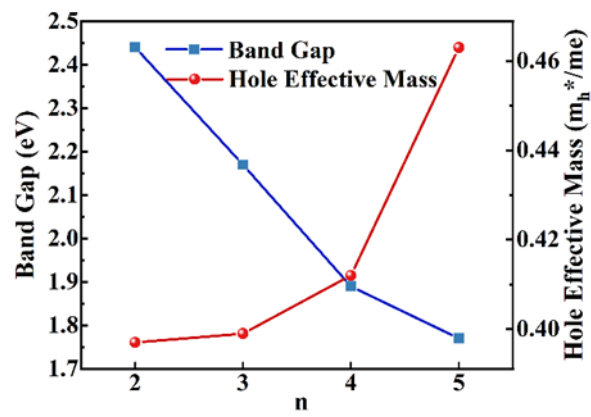

**Fig. S14** The band gap and hole effective mass curves related to the number of layers.

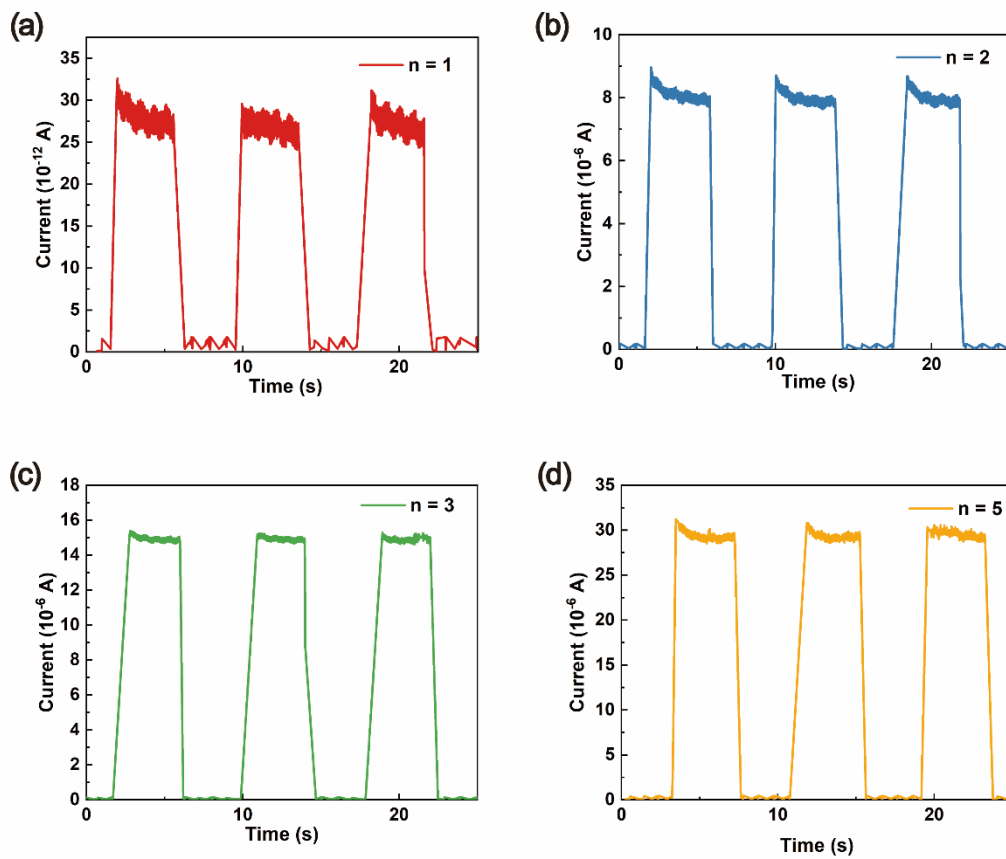

Fig. S15 temporal photocurrent response of 2D perovskite photodetectors with varying layers (a)-(d)  $n = 1, 2, 3, 5$ .

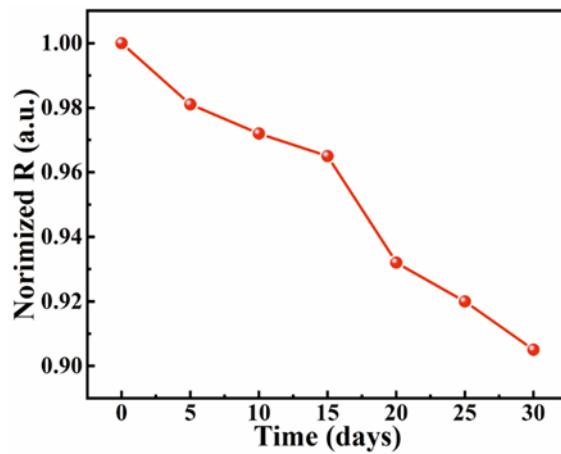

Fig. S16 Stability of  $(\text{PEA})_2(\text{MA})_3\text{Pb}_4\text{I}_{13}$  single crystals photodetector.



**Table S2.** Performance comparison of 2D perovskite-based photodetectors.

| Material                                                             | Modify    | Light Power<br>/Wavelength           | Bias<br>(V) | R<br>(A/W)  | EQE (%)                      | D<br>(Jones)                  | Ref.                                                |
|----------------------------------------------------------------------|-----------|--------------------------------------|-------------|-------------|------------------------------|-------------------------------|-----------------------------------------------------|
| (PEA) <sub>2</sub> PbI <sub>4</sub>                                  | No        | 0.08 μW cm <sup>-2</sup> /460 nm     | 4           | 98.17       | 2.65 × 10 <sup>5</sup>       | 1.62 × 10 <sup>15</sup>       | <b>Nat. Com.</b><br>2018,9,5302                     |
| (PEA) <sub>2</sub> PbI <sub>4</sub>                                  | No        | 10 μW cm <sup>-2</sup> /460 nm       | 5           | 139.6       | 3.77 × 10 <sup>5</sup>       | 1.89 × 10 <sup>15</sup>       | <b>Matter</b> 2019,2,465                            |
| (PA) <sub>2</sub> (FA)Pb <sub>2</sub> I <sub>7</sub>                 | No        | 46 μW cm <sup>-2</sup> /637 nm       | 10          | ----        | ----                         | 1.73 × 10 <sup>14</sup>       | <b>Small</b> 2019,15,<br>1901194                    |
| BDAPbI <sub>4</sub>                                                  | No        | 0.0088 μW cm <sup>-2</sup> /637 nm   | 10          | 0.927       | ----                         | 1.23 × 10 <sup>11</sup>       | <b>Small</b><br>2020,16,2003145                     |
| (PEA) <sub>2</sub> (MA) <sub>2</sub> Pb <sub>3</sub> I <sub>10</sub> | No        | 0.038 μW cm <sup>-2</sup> /598 nm    | 9           | 149         | ----                         | 2 × 10 <sup>12</sup>          | <b>Adv.Sci.</b> 2020,7,<br>2000776                  |
| (PEA) <sub>2</sub> (MA) <sub>3</sub> Pb <sub>4</sub> I <sub>13</sub> | PCBM      | 2.5 μW cm <sup>-2</sup> /570 nm      | ----        | 0.44        | ----                         | 3.38 × 10 <sup>12</sup>       | <b>Adv.</b><br><b>Mater.</b> 2021,33,<br>2101714    |
| (BA) <sub>2</sub> FAPb <sub>2</sub> I <sub>7</sub>                   | No        | 3.5 μW cm <sup>-2</sup> /488 nm      | 10          | 5           | ----                         | 3.5 × 10 <sup>11</sup>        | <b>Adv. Funt.</b><br><b>Mater.</b> 2021,<br>2112277 |
| (CH) <sub>2</sub> (MA) <sub>3</sub> Pb <sub>4</sub> I <sub>13</sub>  | FTO       | 1.5 mW cm <sup>-2</sup> /470 nm      | 3           | 0.046       | ----                         | ----                          | <b>Sci.Rep.</b> 2022,12,<br>2176                    |
| <b>(PEA)<sub>2</sub>(MA)<sub>3</sub>Pb<sub>4</sub>I<sub>13</sub></b> | <b>No</b> | <b>6.4 μW cm<sup>-2</sup>/532 nm</b> | <b>3</b>    | <b>3077</b> | <b>7.19 × 10<sup>6</sup></b> | <b>2.23 × 10<sup>12</sup></b> | <b>This work</b>                                    |
